# Supplementary figures and images for: Band structure engineering for low band gap polymers containing thienopyrazine
Source: Royal Society of Chemistry journal article supplement (doi:10.1039/c2jm12312f), 2012-01-01

## Supporting Information

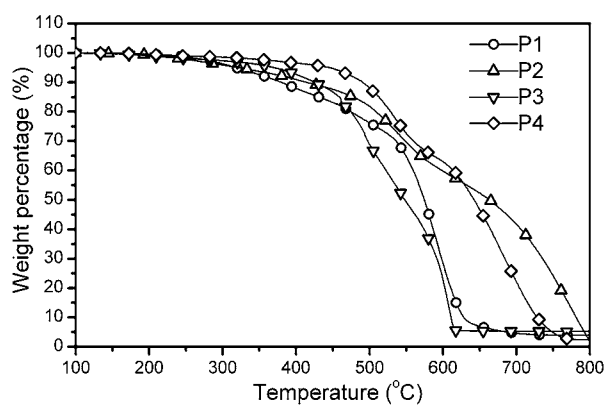

**Fig. S1.** TGA curves of P1 - P4.

Supplement: c2jm12312f.pdf [file c2jm12312f.pdf]
